# Supplementary material
Source: Springer Nature journal article supplement (https://www.springermedizin.de/resource/supplementary/12933_2014_816_MOESM1_ESM.pdf/9539314)
Supplement: MOESM1 [file 9539314]

2010.03.01 ~ 2013.02.28

Patients taken  $^{18}\text{F}$ -FDG-PET/CT  
in the health promotion center of Gangnam Severance Hospital

N=1003

380 patients excluded by BMI criteria  
( $<18.5\text{kg}/\text{m}^2$  or  $\geq 25\text{kg}/\text{m}^2$ )

Normal BMI & aged between 20 - 79 years old

N=623 (Men:325, Women:298)

NWL (normal weight lean)

N=534

NWO (normal weight obesity)

N=89

1<sup>st</sup> & 2<sup>nd</sup> lower tertile of BF%  
(men $<23.5\%$ )

N=287

1<sup>st</sup> & 2<sup>nd</sup> lower tertile of BF%  
(women $<29.2\%$ )

N=247

Highest tertile of BF%  
(men $\geq 23.5\%$ )

N=38

Highest tertile of BF%  
(women $\geq 29.2\%$ )

N=51

exclusion criteria  
(DM, other  
cardiovascular  
disease, etc.)  
N=24

exclusion criteria  
(DM, other  
cardiovascular  
disease, etc.)  
N=18

exclusion criteria  
(DM, other  
cardiovascular  
disease, etc.)  
N=5

exclusion criteria  
(DM, other  
cardiovascular  
disease, etc.)  
N=2

NWL men  
N=263

NWL women  
N=229

NWO men  
N=33

NWO women  
N=49

Randomly selected, age-  
matched NWL men

N=33

Randomly selected, age-  
matched NWL women

N=49
